# Supplementary material for: Shear-flow induced alignment of graphene enables the closest packing crystallography of the (002) textured zinc metal anode with high reversibility
Source: Royal Society of Chemistry journal article supplement (doi:10.1039/d3ee04360f), 2024-01-01
Supplement: d3ee04360f1.pdf [file d3ee04360f1.pdf]

## Supporting Information

**Shear-flow induced alignment of graphene enable the closest packing crystallography of (002) textured zinc metal anode with high-reversibility**

Murong Xi <sup>1a</sup>, Zhenjie Liu <sup>1a</sup>, Wei Wang <sup>a</sup>, Zihan Qi <sup>a</sup>, Rui Sheng <sup>a</sup>, Juan Ding <sup>a</sup>, Yudai Huang <sup>a, \*</sup>, Zaiping Guo <sup>b, \*</sup>

<sup>a</sup> State Key Laboratory of Chemistry and Utilization of Carbon Based Energy Resources, College of Chemistry, Xinjiang University, Urumqi 830017, Xinjiang, China

<sup>b</sup> School of Chemical Engineering, Faculty of Sciences, Engineering and Technology, The University of Adelaide, SA 5005, Australia

Email address: [huangyd@xju.edu.cn](mailto:huangyd@xju.edu.cn); [zaiping.guo@adelaide.edu.au](mailto:zaiping.guo@adelaide.edu.au)

**Keywords:** Shear-flow induced, Graphene-modified copper current collector, Dendritic-free, High-reversible, Zinc anode

## **Experimental Section:**

**Preparation of graphene ink:** graphene (CPG1808, <http://jutan.net.cn/>) is dispersed into ethanol, where the concentration of graphene is controlled at 15wt%-20wt%. In addition, 5% wt of poly(vinyl butyral) (PVB, Aladdin, M.W. 40,000-70,000) (graphene-based mass) is added as an auxiliary dispersant and binder.

**Preparation of graphene-modified copper collector:** The above graphene ink was coated on the surface of Cu foil by means of knife coating method, in which the thickness of the scraped liquid film should be lower than the sheet diameter of graphene. The average size of graphene selected in this work is 5-10  $\mu\text{m}$ , so we chose the thickness of scratch coating as 5  $\mu\text{m}$  in this experiment.

**Preparation of Cu@G@Zn, Cu@Zn anodes:** Fixed capacity Zn deposition was carried out at a current density of 40 mA  $\text{cm}^{-2}$  in a two-electrode system (Cu@G and Cu as the working electrode, and Zn as the counter electrode and reference electrode). In this work, the electrolyte is 2M  $\text{ZnSO}_4$  ( $\text{ZnSO}_4 \cdot 7\text{H}_2\text{O}$ , > 99.995%, Aladdin). For the Zn-MnO<sub>2</sub> double-plated cell, the electrolyte is 2M  $\text{ZnSO}_4$  and 0.1M  $\text{H}_2\text{SO}_4$ +0.4  $\text{MnSO}_4$  (99.995%, Aladdin).

**Preparation of AC, PANI cathodes:** The AC cathode was prepared by mixing AC-YP50F powder, carbon nanotubes (CNTs) and PVDF with a weight ratio of 8:1:1 in 1-methyl-2-pyrrolidone. The PANI cathode was prepared by mixing PANI, AC and PVDF with a weight ratio of 7:2:1 in 1-methyl-2-pyrrolidone solution. Then, the slurry solutions were cast onto carbon papers by the doctor blading method and dried at 80 °C for 12 h under vacuum. After drying, the electrodes were cut into discs with diameters of 12 mm, and the mass loading of AC and PANI is approximately 1-1.5 mg.

**Cell assembly:** The Zn foils (thickness = 100 $\mu\text{m}$ ) was used without further treatment. All electrodes were cut into  $\Phi$ 12 mm discs. Glass fiber separator (GF/A, from Oleggeino, cut into  $\Phi$ 16 mm) was used as the separator and 2M  $\text{ZnSO}_4$  was used as the electrolyte. For Zn//Cu and Zn//Cu@G cells, pristine Zn and Cu or Cu@G was assembled into the 2032 coin-type cells with 80  $\mu\text{L}$  electrolyte.

**Characterization:** The phases of Cu@G@Zn, Cu@Zn were characterized by X-ray

diffraction (XRD, Bruker D8 Advance equipped with Cu K $\alpha$  radiation, Germany) and the morphology was characterized by field-emission scanning electron microscopy (SEM, Hitachi FE-SEM S-4800, Japan).

**Electrochemical Measurements:** Cyclic voltammetry (CV) and linear sweep voltammetry (LSV) curves were obtained by an electrochemical workstation (CHI 760E). The galvanostatic charge/discharge (GCD) measurements were performed by a battery test system (CT2001A, LAND) and NEWARE Battery Test System (MHW-300-5V12A80CH-380V-3C, Shen-zhen, China). The electrochemical impedance spectra (EIS) were measured in a frequency range from 10 mHz to 1 MHz with an AC voltage amplitude of 5 mV (ZAHNER-elektrik electrochemical workstation).

**Computational Methods:** The density functional theory (DFT) calculations have been conducted on Vienna ab-initio simulation package (VASP)<sup>[1]</sup> to study the adsorption process on prepared materials. The Projector augmented wave method<sup>[1b]</sup> with a cutoff energy of 400 eV accompanied by Perdew-Burke-Ernzerhof functional<sup>[2]</sup> has been used in the DFT calculations. DFT-D3 method<sup>[3]</sup> was used to correct the van der Waals interactions, respectively. The (002), (101) and (100) facets of Zn crystal have been cleaved with a vacuum layer of 15 Å to build the slab models, respectively. All models have been fully relaxed with the energy convergence criterion of 10<sup>-6</sup> eV and the force convergence criterion of 0.02 eV/Å, respectively. The Brillouin zone integration was performed with the  $\Gamma$ -point. The adsorption energy ( $E_{ads}$ ) has been calculated using formula 1,

$$E_{ads} = E_{total} - E_{substrate} - E_{adsorbate} \quad (1)$$

The  $E_{total}$ ,  $E_{substrate}$  and  $E_{adsorbate}$  represent the energy of adsorption structure, substrate and adsorbate, respectively. The free energies have been calculated using the following formula 2,

$$G = E_{DFT} + ZPE - TS \quad (2)$$

The  $G$ ,  $E_{DFT}$ , ZPE and TS represent the free energy, energy from DFT calculations, zero point energy and entropic contributions, respectively. The authors extend their gratitude to Theoretical and Computational Chemistry Team from Shiyanjia Lab ([www.shiyanjia.com](http://www.shiyanjia.com)) for providing invaluable assistance.

The ion transport for the Zn anode was predicted with a 2D Nernst-Planck formulation accounting for diffusion and migration in the bulk electrolyte and separators. The modeling domain, geometrical dimensions, and major boundary conditions are shown in Figure 5a, b in the manuscript. The governing equations for Zn anode with polyacrylonitrile membrane were given as formula 3 and 4.

$$\nabla^2 \varphi = -F \sum z_i C_i \quad (3) \quad \frac{\partial C_i}{\partial t} = \nabla \cdot \left[ D_i \nabla C_i + \frac{D_i C_i}{RT} z_i \nabla \varphi \right]$$

(4)

where  $F$ ,  $R$  and  $T$  are the Faraday constant, ideal gas constant and temperature,  $D_i$  is the diffusion coefficient ( $1 \times 10^{-10} \text{ m}^2 \text{ s}^{-1}$  for  $\text{Zn}^{2+}$  and  $1.38 \times 10^{-9} \text{ m}^2 \text{ s}^{-1}$  for  $\text{SO}_4^{2-}$ ),  $C_i$  is the concentration,  $z_i$  is the charge number, and  $\varphi$  is the electrolyte potential. Electroneutrality was assumed throughout the whole domains. In the experiment, the flux of  $\text{Zn}^{2+}$  is uniform through uniform pore structure and ion conductive polyacrylonitrile membrane. The experimental current is  $3 \text{ mA cm}^{-2}$ , the electrode length is 5 microns, and the overall diffusion distance of electrolyte is 2 microns. A model with bubbles and initial structure is established to obtain the concentration distribution and electric field distribution in different deposition states (Figure 5a, b). The processed electrochemistry model was imported into the finite element software COMSOL® (Stockholm, Sweden), where the material properties were defined and the relevant problems were calculated and analyzed. To solve the discretized transport and electrode deformation kinematics equations, the Parallel Direct Sparse Solver (PARDISO) was employed. Time stepping was handled using the 2nd order backward Euler differentiation.

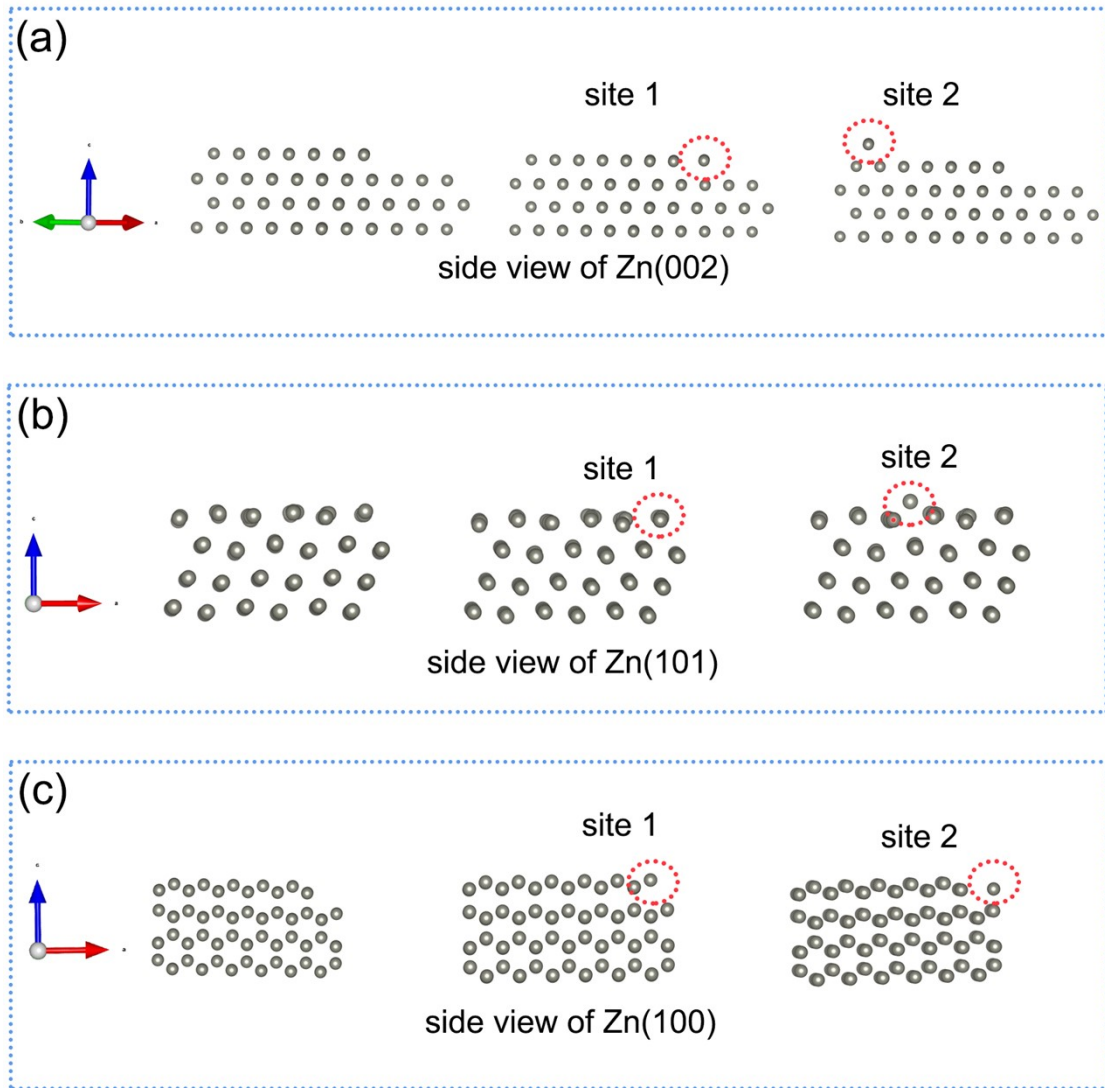

Figure S1. (a-c) Initial and side view of the calculation models of Zn absorbed on the (a) Zn (002), (b) Zn (101), and (c) Zn (100).

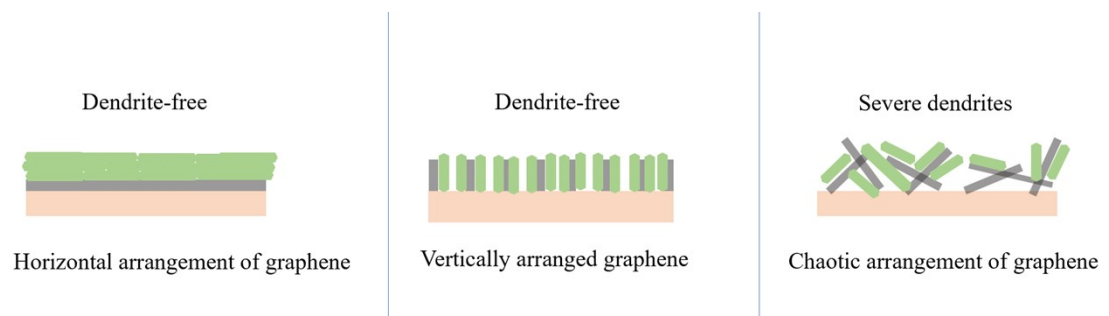

Figure S2. Diagram of Zn plating on different forms of graphene.

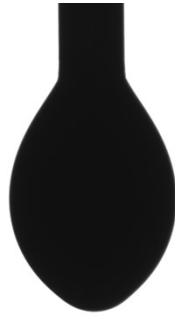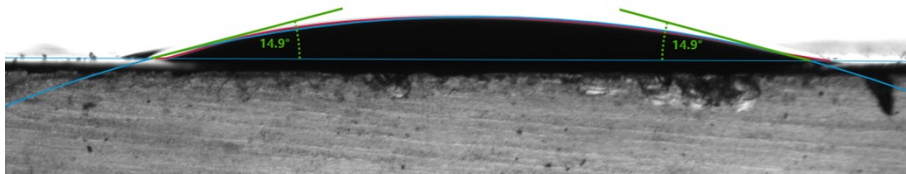

Figure S3. Contact angle of graphene ink on Cu foil surface.

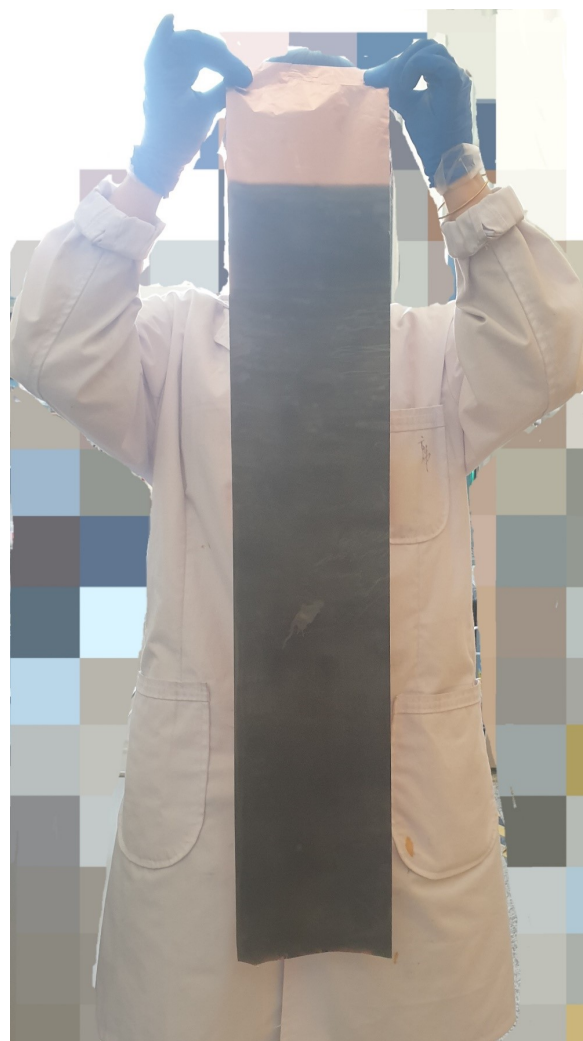

Figure S4. Optical photograph about experimenter demonstrating prepared large-area Cu@G collector.



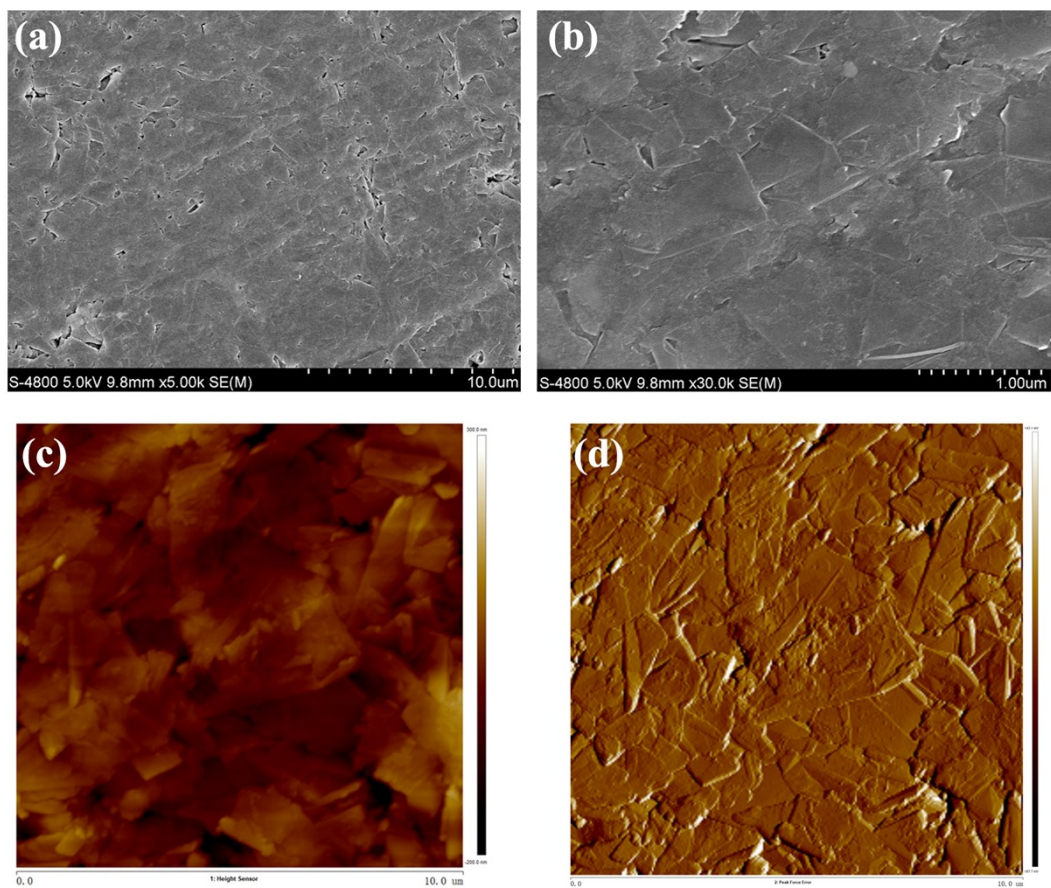

Figure S5. (a,b) SEM images and (c,d) AFM images of the prepared Cu@G collector .

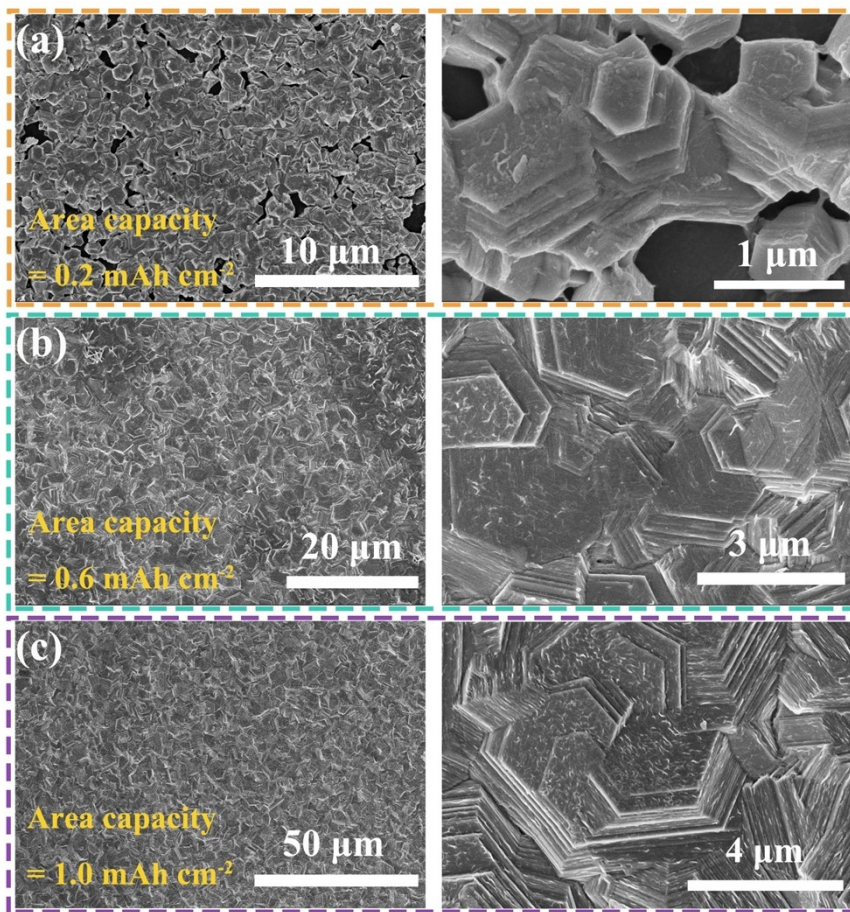

Figure S6. SEM images of Zn plated on Cu@G at  $40 \text{ mA cm}^{-2}$  with different area capacity.

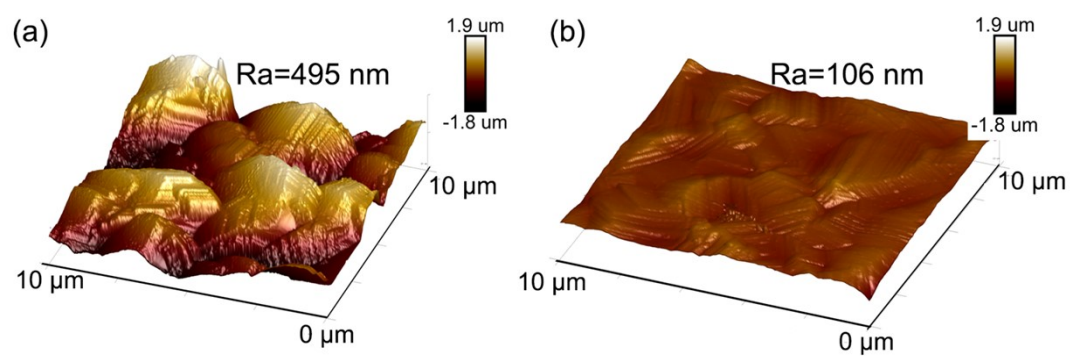

Figure S7. AFM images of Zn plated on (a) Cu and (b) Cu@G at  $40\text{ mA cm}^{-2}$  with  $1.5\text{ mA h cm}^{-2}$ .

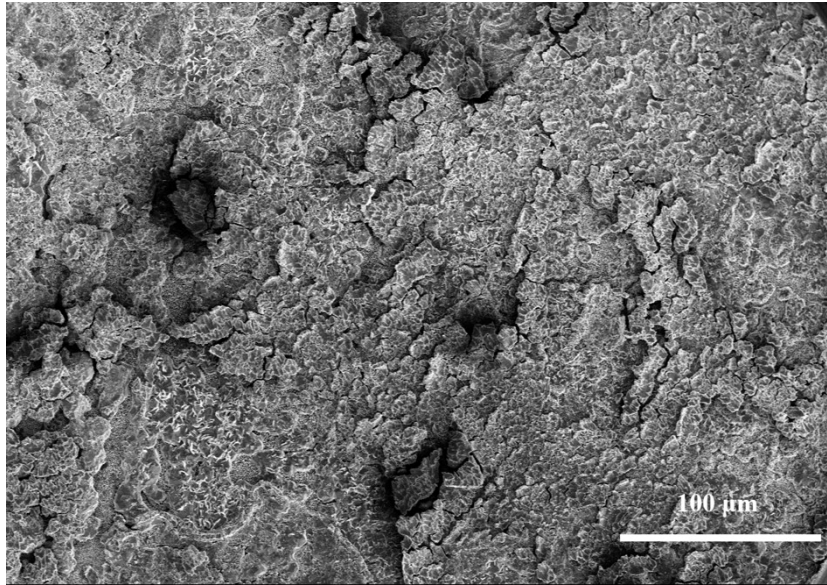

Figure S8. SEM image of Zn plated on Cu at  $40 \text{ mA cm}^{-2}$  with  $1.5 \text{ mA h cm}^{-2}$ .

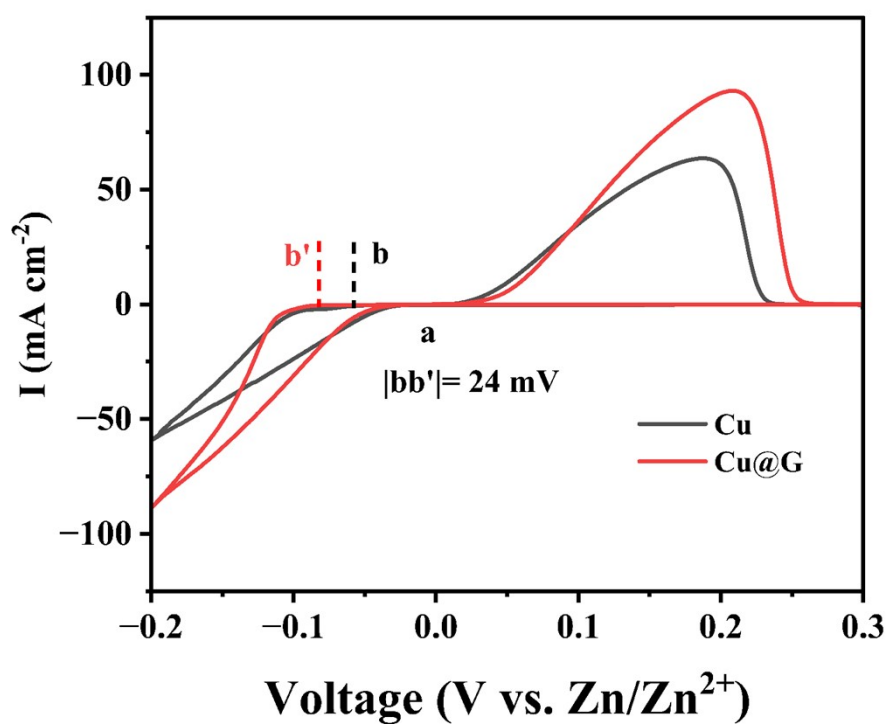

Figure S9. CV curves of Zn on Cu and Cu@G collectors.

A crossover characteristic can be observed as the positive sweeping potentials and the crossover potential is located at the point (a). The potential difference between the crossover point (a) and the point (b or b') is considered as the nucleation overpotential. In this work, the current density=0 line is used as the reference line to calculate the points b and b'.

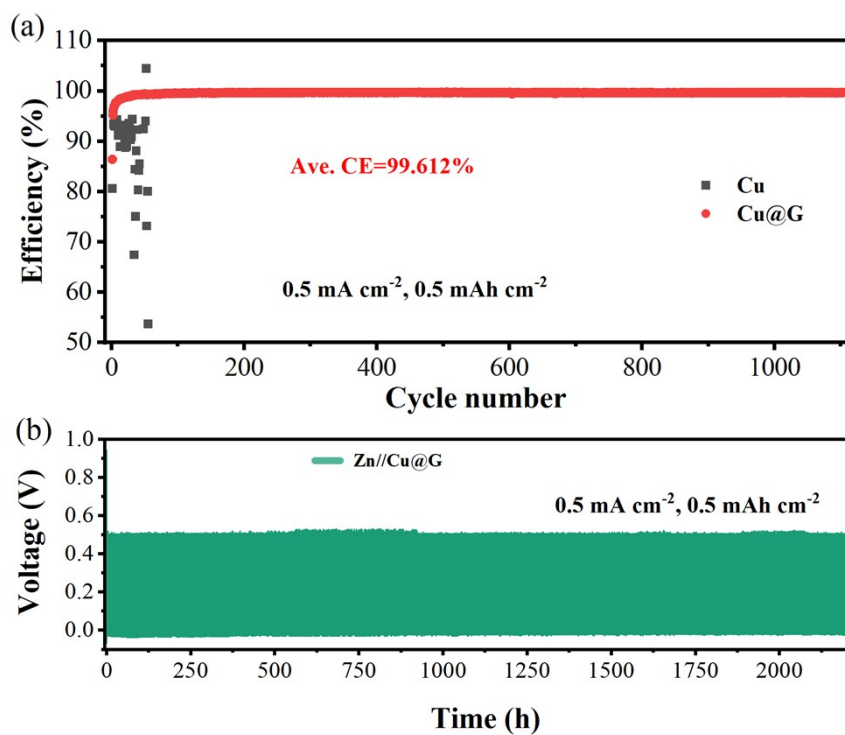

Figure S10. (a) ACE of Cu and Cu@G at 0.5 mA cm<sup>-2</sup> with 0.5 mA h cm<sup>-2</sup> and (b) corresponding voltage-time curve of Zn//Cu@G half battery.

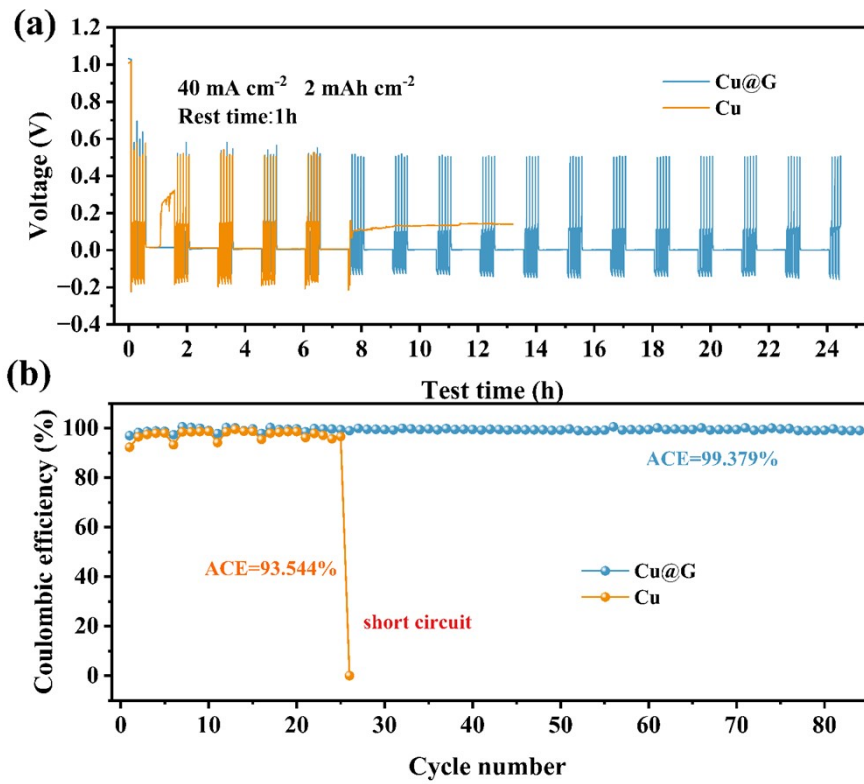

Figure S11. (a) Shelving-recovery performance, and (b) the ACE of Cu and Cu@G collector.

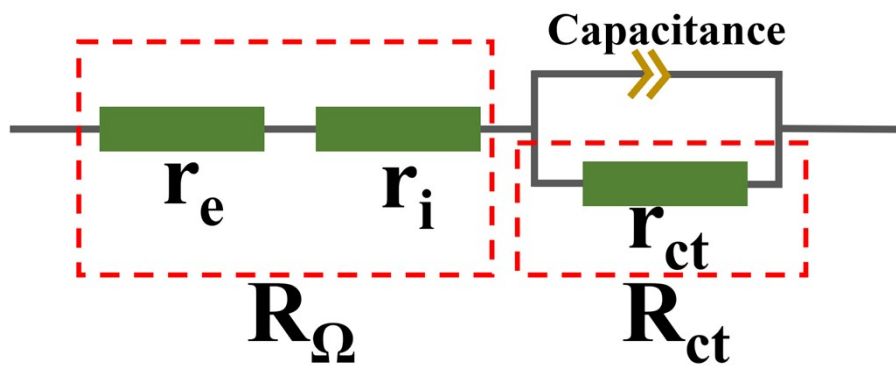

Figure S12. Equivalent circuit diagram for normal condition.



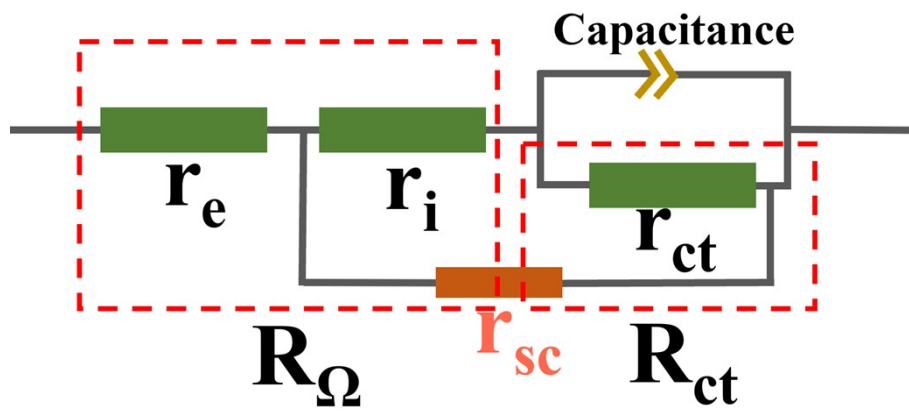

Figure S13. Equivalent circuit diagram for soft shorts.

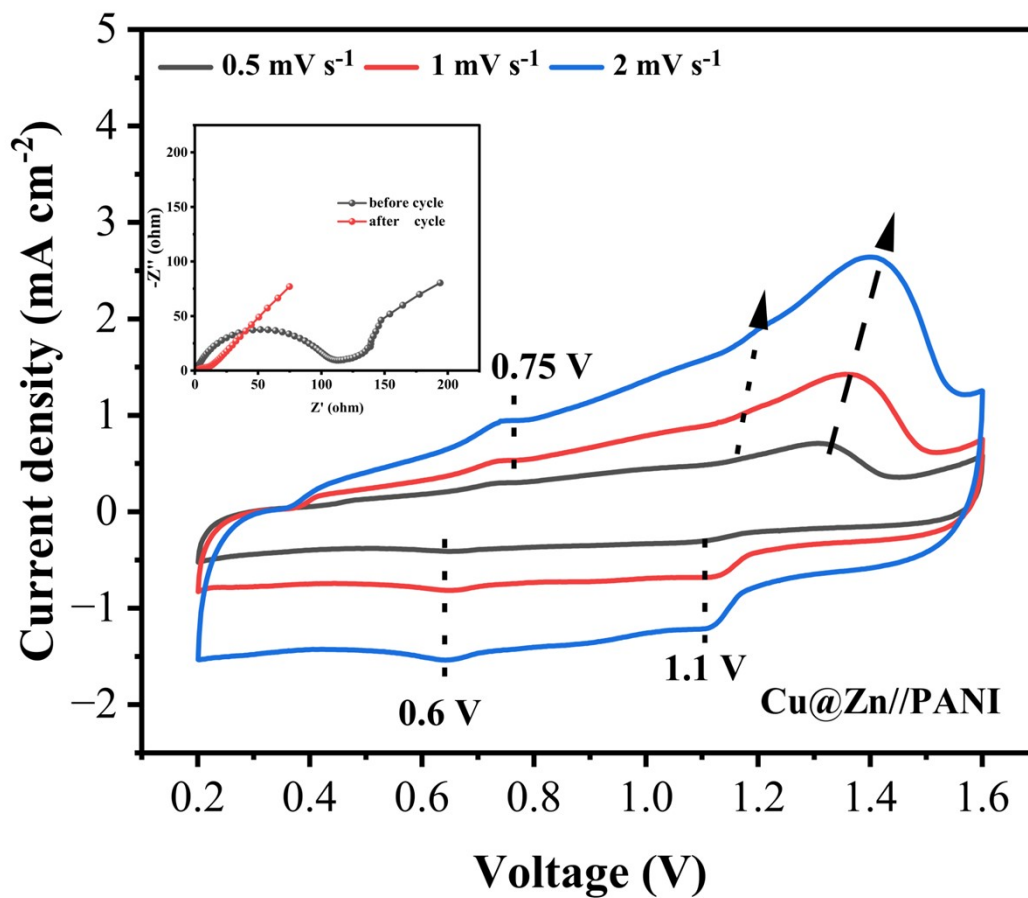

Figure S14. CV curves of Cu@Zn//PANI battery at different scan rate with N/P=4.5, inset: EIS spectra of Cu@G@Zn//PANI battery before and after cycle at different scanning rates

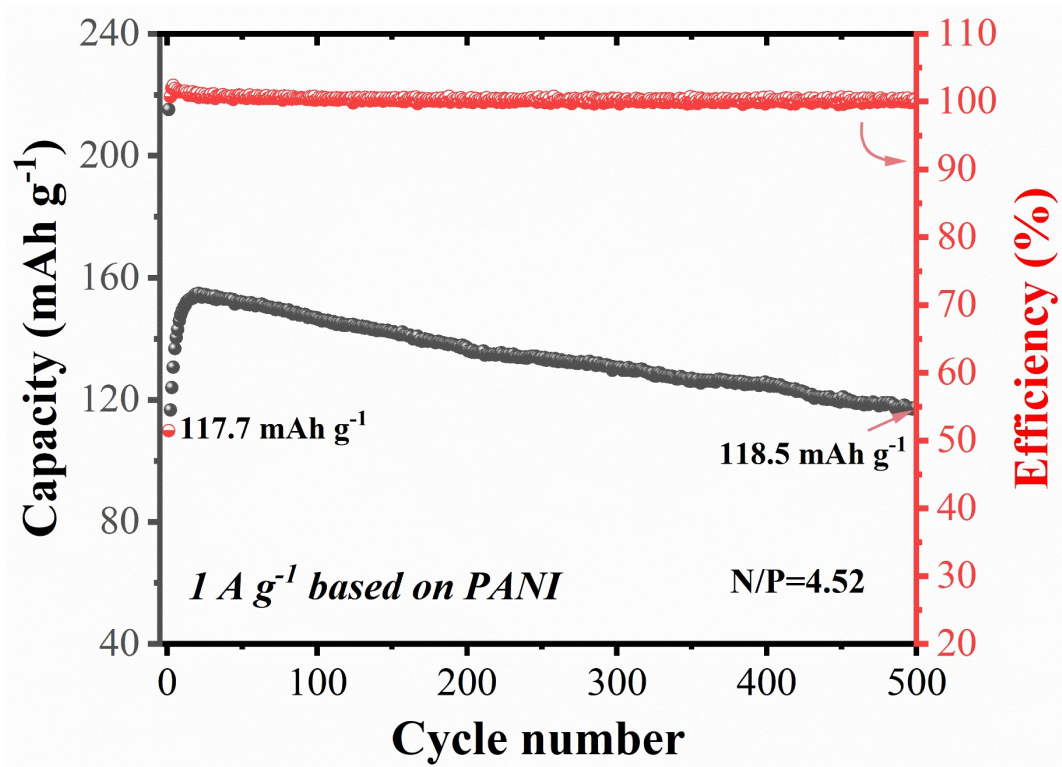

Figure S15. Long cycle performance of Cu@G@Zn//PANI battery at N/P=4.52.

Table S1. Summary of reported strategies for optimizing Zn anodes with graphene and its derivatives.

| Materials                                                                           | Preparation methods                       | Material                                                 | Mechanism                                                           | Ref.                                               |
|-------------------------------------------------------------------------------------|-------------------------------------------|----------------------------------------------------------|---------------------------------------------------------------------|----------------------------------------------------|
| G@SS                                                                                | Doctor blading                            | graphene                                                 | Inducing Zn(002) orientatioanl deposition                           | <i>Science</i> 2019, 366, 645                      |
| N-VG@CC                                                                             | Plasma enhanced chemical vapor deposition | N/O co-doped vertical graphene                           | Providing zincophilicity sites                                      | <i>Adv. Funct. Mater.</i> 2021, 31, 2103922        |
| Gr-modified Cu                                                                      | Chemical vapor deposition                 | graphene                                                 | Inducing Zn(002) orientatioanl deposition                           | <i>ACS Appl. Mater. Interfaces</i> 2019, 11, 44077 |
| Ti <sub>3</sub> C <sub>2</sub> T <sub>x</sub> MXene-reduced graphene oxide aerogels | freeze-dried                              | MXene and rGO                                            | Inducing uniform deposition                                         | <i>Adv. Energy Mater.</i> 2023, 13, 2301557.       |
| 3DG@ZN                                                                              | 3D printing                               | Functionalized GO                                        | Improving conductivity and regulating Zn <sup>2+</sup> distribution | <i>Energy Storage Mater.</i> 2023, 54, 75          |
| 3D-RFGC@Zn                                                                          | Thermal-chemical vapor deposition         | 3D N-doped Gr nanofibers/clusters and vertical Gr arrays | Providing zincophilicity sites                                      | <i>Nat. Commun.</i> 2023, 14, 4205                 |
| EBP-NG/Zn                                                                           | Langmuir-Blodgett method                  | N-doped graphene and black phosphorus nanosheets         | Inducing Zn(002) orientational deposition                           | <i>Energy Storage Mater.</i> 2023, 56, 468         |
| arranged GO sheets@Zn                                                               | Freeze-drying and thermal mild reduction  | GO derivative                                            | Providing zincophilicity sites                                      | <i>Adv. Mater.</i> 2023, 35, 2205206               |
| NOC@Zn                                                                              | Plasma enhanced chemical vapor deposition | N/O co-doped mosaic nanocrystalline graphene structure   | Inducing Zn(002) orientatioanl deposition                           | <i>Adv. Sci.</i> 2023, 10, 2206077                 |
| CNG/Zn                                                                              |                                           | Cellulose nanowhisiker and graphene                      | Inducing Zn(002) orientational deposition                           | <i>Energy Environ. Sci.</i> 2021, 14, 3120         |
| NGO@Z                                                                               | Langmuir-                                 | N-doped GO                                               | Providing                                                           | <i>Adv. Mater.</i> 2021, 33,                       |

|        |                               |                             |                  |       |                                                                            |                                     |
|--------|-------------------------------|-----------------------------|------------------|-------|----------------------------------------------------------------------------|-------------------------------------|
| n      | Blodgett method               |                             |                  |       | zincophility Sites                                                         | 2101649                             |
| EBP-NG | Step-by-step coating strategy | Exfoliated black phosphorus | N-doped graphene |       | Providing zincophility sites and inducing Zn(002) orientational Deposition | Energy Storage Mater. 2023, 56, 468 |
| ZGL@Zn | Doctor blading                | ZIF-8, PVDF                 | GO               | and / |                                                                            | Energy Storage Mater. 2022, 47, 602 |

---

Table S2. Comparison of performances of Zn//Cu cells with those of the latest reported literatures in terms of three parameters: ACE, current density  $\times$  per-cycle capacity, cumulative plated capacity (CPC).

| Sample                                                            | mA cm <sup>-2</sup> $\times$<br>mA h cm <sup>-2</sup> | Cycle<br>number | ACE (%)       | CPC (mA<br>h cm <sup>-2</sup> ) | Ref                                             |
|-------------------------------------------------------------------|-------------------------------------------------------|-----------------|---------------|---------------------------------|-------------------------------------------------|
| <b>Cu@G</b>                                                       | <b>80</b>                                             | <b>6900</b>     | <b>99.977</b> | <b>13,860</b>                   | <b>This work</b>                                |
| <b>Cu@G</b>                                                       | <b>100</b>                                            | <b>1500</b>     | <b>99.908</b> | <b>3000</b>                     | <b>This work</b>                                |
| LLP@Treated                                                       | 5                                                     | 1200            | 99.37         | 1200                            | ACS Energy Lett.<br>2023, 8, 8, 3297–<br>3306.  |
| ZIF                                                               | 25                                                    | 300             | 99.4          | 1500                            | Adv. Sci.2020,7,<br>2002173.                    |
| Zn <sub>3</sub> (PO <sub>4</sub> ) <sub>2</sub> /ZnF <sub>2</sub> | 8                                                     | 90              | 99.37         | 180                             | Energy Environ.<br>Sci., 2021,14,<br>3609-3620. |
| Nafion-Zn-X                                                       | 0.25                                                  | 130             | 97            | 75                              | Angew.Chem.Int.E<br>d.2020,59,16594–<br>16601.  |
| ZnS                                                               | 2                                                     | 200             | 99.2          | 200                             | Adv.Mater.2020,<br>32, 2003021.                 |
| Mxene                                                             | 0.25                                                  | 160             | 98.1          | 80                              | Energy Stor.<br>Mater. 62 (2023)<br>102921.     |
| $\beta$ -PVDF                                                     | 0.0648                                                | 200             | 96.9          | 36                              | Chem. Eng. J. 411<br>(2021) 128584.             |
| 60alucone                                                         | 0.25                                                  | 80              | 98.6          | 40                              | J. Mater. Chem. A,<br>2020,8, 22100-<br>22110.  |
| ZrO <sub>2</sub>                                                  | 5                                                     | 220             | 95.5          | 220                             | Adv. Funct.<br>Mater.2020, 30,<br>1908528.      |
| ZnO-3D                                                            | 1                                                     | 300             | 99.55         | 150                             | Energy Environ.<br>Sci., 2020,13, 503-<br>510.  |
| TiO <sub>2</sub> /PVDF                                            | 1.56645                                               | 1000            | 99.4          | 88.5                            | Adv. Funct.<br>Mater.2021, 31,<br>2001867.      |
| Sc <sub>2</sub> O <sub>3</sub>                                    | 0.6328                                                | 260             | 99.85         | 145.6                           | J. Energy Chem. 55<br>(2021) 549–556.           |
| SPEEK-Zn                                                          | 1                                                     | 600             | 99.47         | 600                             | Energy Stor.<br>Mater. 49 (2022)                |

|                         |      |      |       |      |                                               |
|-------------------------|------|------|-------|------|-----------------------------------------------|
|                         |      |      |       |      | 380–389.                                      |
| 502-glue                | 2    | 200  | 99.74 | 200  | Energy Stor. Mater. 36 (2021) 132–138.        |
| USL                     | 1    | 600  | 99.34 | 600  | Nano Energy 103 (2022) 107751.                |
| PDMS/TiO <sub>2-x</sub> | 10   | 700  | 99.6  | 700  | Adv.Mater.2022, 34, 2105133.                  |
| ACG                     | 0.5  | 2000 | 99.8  | 1000 | J. Am. Chem. Soc. 2022, 144, 25, 11168–11177. |
| PA                      | 2    | 800  | 99.9  | 800  | Energy Environ. Sci., 2022,15, 1872-1881.     |
| CAZ                     | 0.25 | 750  | 99.8  | 375  | Small 2022, 18, 2203327.                      |
| PI                      | 8    | 1000 | 99.5  | 2000 | Adv.Mater.2021, 33, 2007497.                  |
| Fluorinated interphase  | 0.25 | 1000 | 99.9  | 500  | Nat. Nanotechnol. 16(8) (2021) 902-910.       |
| ITO                     | 2    | 1100 | 99.9  | 1100 | Angew. Chem.Int. Ed.2023,62, e2023084.        |
| 3D-NC                   | 2    | 130  | 97.6  | 130  | J. Mater. Chem. A, 2022,10, 17440-17451.      |
| ZnF <sub>2</sub>        | 5    | 1000 | 99.5  | 1000 | Adv.Mater.2021, 33, 2007388.                  |
| Cu@AOF                  | 10   | 6000 | 99.9  | 6000 | Adv. Energy Mater. 2023, 13, 2204388.         |
| Cu@AOF                  | 200  | 450  | 99.82 | 4500 | Adv. Energy Mater. 2023, 13, 2204388.         |
| C/Cu                    | 0.5  | 300  | 99.6  | 150  | Nano Lett. 2021, 21, 3, 1446–1453.            |
| SIR                     | 1    | 1000 | 99.7  | 1000 | Angew. Chem.Int. Ed.2022,61,e2021 14789.      |
| ex-ZrP                  | 18   | 200  | 99.5  | 600  | Energy Environ. Sci., 2022,15, 1682-1693.     |

|             |      |       |       |        |                                           |
|-------------|------|-------|-------|--------|-------------------------------------------|
| Zn(101)     | 150  | 160   | 99.3  | 1600   | Adv. Mater. (2023) 2305988.               |
| Etched Zn   | 10   | 4500  | 99.92 | 4500   | Energy Environ. Sci., (2023).             |
| NGO         | 5    | 300   | 99.5  | 300    | Adv.Mater.2021, 33, 2101649.              |
| Carbon dots | 0.25 | 1000  | 99.3  | 500    | Adv. Energy Mater. 12(26) (2022) 2200665. |
| EBP-NG      | 1    | 1140  | 99.66 | 570    | Energy Stor. Mater. 56 (2023) 468–477.    |
| CNG         | 0.25 | 300   | 99.4  | 150    | Energy Environ. Sci., 2021,14, 3120-3129. |
| FLG         | 1    | 100   | 98    | 100    | J. Alloys Compd. 891 (2021) 161886.       |
| N-C         | 4    | 120   | 98.76 | 240    | Dalton Trans., 2020,49, 17629-17634.      |
| NOC         | 10   | 800   | 99.5  | 800    | Adv. Sci.2023,10, 2206077.                |
| Graphene    | 64   | 10000 | 99.9  | 16,000 | Science 366, 645–648 (2019).              |
| Graphene    | 128  | 2250  | 99.7  | 7200   | Science 366, 645–648 (2019).              |



**Reference:**

- [1] a)G. Kresse, J. Furthmüller, *Physical Review B* **1996**, 54, 11169; b)G. Kresse, D. Joubert, *Physical Review B* **1999**, 59, 1758.
- [2] J. P. Perdew, K. Burke, M. Ernzerhof, *Physical Review Letters* **1996**, 77, 3865.
- [3] S. Grimme, J. Antony, S. Ehrlich, H. Krieg, *The Journal of Chemical Physics* **2010**, 132, 154104.
